# Supplementary material for: Veno-venous extracorporeal membrane oxygenation as a bridge in central airway obstruction: experience from a high-volume center
Source: PubMed Central journal article supplement (PMC11660460; doi:10.1186/s13054-024-05219-0), 2024-12-20
Supplement: 13054_2024_5219_MOESM1_ESM.pdf [file 13054_2024_5219_MOESM1_ESM.pdf]

**Table S1.** ECMO related parameters

| ECMO-Related Indicators                             | Primary Tumor   | Tumor Metastasis | Artificial Airway | P value |
|-----------------------------------------------------|-----------------|------------------|-------------------|---------|
| Number                                              | 17              | 7                | 5                 |         |
| ECMO Flow (L/min)                                   | 3(3-5)          | 3.5(2-4)         | 3.3(3.1-3.9)      | 0.298   |
| ECMO Operating Time                                 | 26(18-51)       | 19(12-28)        | 34(15-61)         | 0.494   |
| Anticoagulated (Yes, %)                             | 2(11.8%)        | 0(0%)            | 0(0%)             | 0.481   |
| ECMO-Related Complications<br>(Thrombosis/Bleeding) | 0(0%)           | 0(0%)            | 0(0%)             | 1.000   |
| Preoperative HGB                                    | 134(125-145)    | 120(98-130)      | 114(112-128)      | 0.037   |
| Postoperative HGB                                   | 110(98-121)     | 91(88-123)       | 114(103-119)      | 0.547   |
| Preoperative PLT                                    | 201(150-256)    | 205(165-247)     | 238(169-302)      | 0.518   |
| Postoperative PLT                                   | 150(128-212)    | 173(130-223)     | 170(132-223)      | 0.750   |
| Preoperative APTT                                   | 27.3(25.6-29.3) | 26.8(26.1-30.6)  | 28.2(25.7-33.7)   | 0.629   |
| Postoperative APTT                                  | 29.5(24.7-32.7) | 35.2(32.3-36.9)  | 32.3(27.3-37.3)   | 0.171   |
| Blood Transfusion                                   | 0(0%)           | 2(28.6%)         | 0(0%)             | 0.038   |

**Table S1 Case series of VV ECMO in airway obstruction**

| Case | Age | Gender | CAO Causes | Intervention | Complications | Anticoagulation | Run time (h) | Flow(L/min) | Artificial airway | Tumor size    | Position of obstruction | Diameter of the narrowest part of the airway | Survival (6m) |
|------|-----|--------|------------|--------------|---------------|-----------------|--------------|-------------|-------------------|---------------|-------------------------|----------------------------------------------|---------------|
| 1    | 66  | 1      | 1          | 3            | 0             | 0               | 20           | 4           | 0                 | 1.0cm*1.1cm   | IV, V                   | 2mm                                          | 1             |
| 2    | 39  | 1      | 1          | 2            | 0             | 0               | 26           | 2.7         | 1                 | 1.9*1.8*1.9cm | II                      | 2mm                                          | 1             |
| 3    | 33  | 1      | 1          | 3            | 0             | 0               | 5            | 2.4         | 1                 | 1.5*1cm       | I                       | 5mm                                          | 1             |
| 4    | 60  | 1      | 1          | 3            | 0             | 0               | 120          | 3           | 0                 | NA            | IV                      | 2mm                                          | 1             |
| 5    | 48  | 1      | 1          | 2            | 0             | 0               | 11           | 3           | 1                 | 2.1*2.7cm     | II                      | 2mm                                          | 1             |
| 6    | 64  | 1      | 1          | 2            | 0             | 1               | 48           | 3.5         | 1                 | NA            | IV                      | 2mm                                          | 1             |
| 7    | 80  | 0      | 1          | 2            | 0             | 0               | 21           | 3.5         | 0                 | 1.5*1.0cm     | I                       | 3mm                                          | 1             |
| 8    | 48  | 1      | 1          | 2            | 0             | 0               | 26           | 3           | 0                 | 3.5cm         | I                       | 2mm                                          | 1             |
| 9    | 71  | 1      | 1          | 1            | 0             | 0               | 73           | 3           | 1                 | 5.8cm×3.5cm   | I                       | 4.4mm                                        | 1             |
| 10   | 32  | 0      | 1          | 2            | 0             | 0               | 48           | 3           | 0                 | 1.5cm         | III                     | 5mm                                          | 1             |
| 11   | 57  | 1      | 1          | 3            | 0             | 0               | 16           | 3           | 0                 | 15*25*23mm    | I                       | 3mm                                          | 1             |
| 12   | 46  | 1      | 1          | 2            | 0             | 0               | 24           | 3.2         | 0                 | 3.6*3.2*3.3cm | I                       | 2mm                                          | 1             |
| 13   | 31  | 0      | 1          | 2            | 1             | 0               | 69           | 3           | 2                 | 2*1.5*1.5cm   | II                      | 1mm                                          | 1             |
| 14   | 69  | 0      | 1          | 1            | 0             | 1               | 54           | 2           | 2                 | NA            | NA                      | 3mm                                          | 1             |
| 15   | 59  | 0      | 1          | 1            | 0             | 0               | 31           | 3           | 1                 | NA            | NA                      | 4. 5mm                                       | 1             |
| 16   | 52  | 0      | 1          | 2            | 0             | 0               | 21           | 3.5         | 0                 | 18*10*11mm    | II                      | 3.8mm                                        | 1             |
| 17   | 51  | 1      | 2          | 3            | 0             | 0               | 19           | 1.65        | 1                 | 1.8*2.5cm     | II                      | 5mm                                          | 1             |
| 18   | 60  | 1      | 2          | 3            | 0             | 0               | 20           | 3.5         | 0                 | 1.5cm         | II                      | 5mm                                          | 1             |
| 19   | 52  | 1      | 2          | 3            | 0             | 0               | 168          | 2           | 0                 | NA            | I                       | 6mm                                          | 1             |
| 20   | 75  | 0      | 2          | 3            | 0             | 0               | 28           | 3.5         | 0                 | 5.5*6.8cm     | I                       | 1mm                                          | 1             |
| 21   | 46  | 0      | 2          | 2            | 0             | 0               | 18           | 4           | 1                 | 1.8*2.2cm     | III                     | 2mm                                          | 1             |
| 22   | 57  | 1      | 2          | 2            | 0             | 0               | 12           | 4.3         | 0                 | 1.2cm         | I                       | 3mm                                          | 1             |
| 23   | 71  | 0      | 2          | 3            | 0             | 0               | 5            | 3           | 1                 | NA            | IV、 V                   | 3mm                                          | 1             |

|    |    |   |   |   |   |   |    |     |   |    |       |     |   |
|----|----|---|---|---|---|---|----|-----|---|----|-------|-----|---|
| 24 | 17 | 1 | 3 | 1 | 0 | 0 | 5  | 3.3 | 1 | NA | IV、 V | 4mm | 1 |
| 25 | 27 | 1 | 3 | 2 | 0 | 0 | 24 | 4.4 | 0 | NA | II    | 5mm | 1 |
| 26 | 21 | 0 | 3 | 2 | 0 | 0 | 6  | 3.4 | 1 | NA | I     | 1mm | 1 |
| 27 | 48 | 1 | 3 | 2 | 0 | 0 | 44 | 3.2 | 1 | NA | I     | 5mm | 1 |
| 28 | 55 | 0 | 3 | 2 | 0 | 0 | 34 | 3   | 2 | NA | I     | 6mm | 1 |
| 29 | 69 | 1 | 1 | 1 | 0 | 0 | 78 | 3   | 2 | NA | II    | 4mm | 1 |

CAO causes: Primary airway tumors =1、 Metastatic airway tumors=2、 Artificial airway causes benign airway hyperplasia =3;

Intervention approach: Otorhinolaryngological surgery = 1; thoracic surgery = 2, interventional surgery = 3;

Artificial airway: 0 = No artificial airway=0; Endotracheal intubation=1; Tracheostomy=2.
